# Supplementary material
Source: publisher figshare collection journal article supplement (https://acs.figshare.com/ndownloader/files/4496095)
Supplement: Supplementary file 1 [file 4496095]

 
data_t 
 
_audit_creation_method            SHELXL-97 
_chemical_name_systematic 
; 
 ? 
; 
_chemical_name_common             ? 
_chemical_melting_point           ? 
_chemical_formula_moiety          
 'C7 H14 Cl N10 O6 Pr'
_chemical_formula_sum 
 'C7 H14 Cl N10 O6 Pr' 
_chemical_formula_weight          510.64 
 
loop_ 
 _atom_type_symbol 
 _atom_type_description 
 _atom_type_scat_dispersion_real 
 _atom_type_scat_dispersion_imag 
 _atom_type_scat_source 
 'C'  'C'   0.0033   0.0016 
 'International Tables Vol C Tables 4.2.6.8 and 6.1.1.4' 
 'H'  'H'   0.0000   0.0000 
 'International Tables Vol C Tables 4.2.6.8 and 6.1.1.4' 
 'N'  'N'   0.0061   0.0033 
 'International Tables Vol C Tables 4.2.6.8 and 6.1.1.4' 
 'O'  'O'   0.0106   0.0060 
 'International Tables Vol C Tables 4.2.6.8 and 6.1.1.4' 
 'Cl'  'Cl'   0.1484   0.1585 
 'International Tables Vol C Tables 4.2.6.8 and 6.1.1.4' 
 'Pr'  'Pr'  -0.2180   2.8214 
 'International Tables Vol C Tables 4.2.6.8 and 6.1.1.4' 
 
_symmetry_cell_setting            triclinic 
_symmetry_space_group_name_H-M    'P -1'
_symmetry_space_group_name_Hall   '-P 1' 
 
loop_ 
 _symmetry_equiv_pos_as_xyz 
 'x, y, z' 
 '-x, -y, -z' 
 
_cell_length_a                    8.9630(18) 
_cell_length_b                    10.197(2) 
_cell_length_c                    10.199(2) 
_cell_angle_alpha                 65.14(3) 
_cell_angle_beta                  70.43(3) 
_cell_angle_gamma                 84.41(3) 
_cell_volume                      795.9(4) 
_cell_formula_units_Z             2 
_cell_measurement_temperature     291(2) 
_cell_measurement_reflns_used     ? 
_cell_measurement_theta_min       ? 
_cell_measurement_theta_max       ? 
 
_exptl_crystal_description        prism 
_exptl_crystal_colour             colorless 
_exptl_crystal_size_max           0.20 
_exptl_crystal_size_mid           0.20 
_exptl_crystal_size_min           0.20 
_exptl_crystal_density_meas       ? 
_exptl_crystal_density_diffrn     2.131 
_exptl_crystal_density_method     'not measured' 
_exptl_crystal_F_000              500 
_exptl_absorpt_coefficient_mu     3.281 
_exptl_absorpt_correction_type    multi-scan 
_exptl_absorpt_correction_T_min   0.5598 
_exptl_absorpt_correction_T_max   0.5598 
_exptl_absorpt_process_details    
'Jacobson, R. (1998) Private communication to Rigaku Corp.' 
 
_exptl_special_details 
; 
 ? 
; 
 
_diffrn_ambient_temperature       291(2) 
_diffrn_radiation_wavelength      0.71073 
_diffrn_radiation_type            MoK\a 
_diffrn_radiation_source          'fine-focus sealed tube' 
_diffrn_radiation_monochromator   graphite 
_diffrn_measurement_device_type   'Rigaku Mercury'  
_diffrn_measurement_method        \w   
_diffrn_detector_area_resol_mean  ? 
_diffrn_standards_number          0 
_diffrn_standards_interval_count  0 
_diffrn_standards_interval_time   0 
_diffrn_standards_decay_%         0
_diffrn_reflns_number             8353 
_diffrn_reflns_av_R_equivalents   0.0272 
_diffrn_reflns_av_sigmaI/netI     0.0352 
_diffrn_reflns_limit_h_min        -11 
_diffrn_reflns_limit_h_max        11 
_diffrn_reflns_limit_k_min        -13 
_diffrn_reflns_limit_k_max        13 
_diffrn_reflns_limit_l_min        -13 
_diffrn_reflns_limit_l_max        13 
_diffrn_reflns_theta_min          3.19 
_diffrn_reflns_theta_max          27.46 
_reflns_number_total              3626 
_reflns_number_gt                 3353 
_reflns_threshold_expression      >2sigma(I) 
 
_computing_data_collection        'CrystalClear, Ver. 1.30 (Rigaku/MSC, 2001)'
_computing_cell_refinement        'CrystalClear, Ver. 1.30 (Rigaku/MSC, 2001)'
_computing_data_reduction
 'CrystalStructure, Ver. 3.60 (Rigaku/MSC, 2004)'
_computing_structure_solution     'SHELXS-97 (Sheldrick, 1990)' 
_computing_structure_refinement   'SHELXL-97 (Sheldrick, 1997)' 
_computing_molecular_graphics     'SHELXL-97 (Sheldrick, 1997)'
_computing_publication_material   'SHELXL-97 (Sheldrick, 1997)'
 
_refine_special_details 
; 
 Refinement of F^2^ against ALL reflections.  The weighted R-factor wR and 
 goodness of fit S are based on F^2^, conventional R-factors R are based 
 on F, with F set to zero for negative F^2^. The threshold expression of 
 F^2^ > 2sigma(F^2^) is used only for calculating R-factors(gt) etc. and is 
 not relevant to the choice of reflections for refinement.  R-factors based 
 on F^2^ are statistically about twice as large as those based on F, and R- 
 factors based on ALL data will be even larger. 
; 
 
_refine_ls_structure_factor_coef  Fsqd  
_refine_ls_matrix_type            full 
_refine_ls_weighting_scheme       calc  
_refine_ls_weighting_details 
 'calc w=1/[\s^2^(Fo^2^)+(0.0145P)^2^+2.8370P] where P=(Fo^2^+2Fc^2^)/3' 
_atom_sites_solution_primary      direct 
_atom_sites_solution_secondary    difmap 
_atom_sites_solution_hydrogens    geom 
_refine_ls_hydrogen_treatment     mixed 
_refine_ls_extinction_method      none 
_refine_ls_extinction_coef        ? 
_refine_ls_number_reflns          3626 
_refine_ls_number_parameters      254 
_refine_ls_number_restraints      7 
_refine_ls_R_factor_all           0.0297 
_refine_ls_R_factor_gt            0.0248 
_refine_ls_wR_factor_ref          0.0618 
_refine_ls_wR_factor_gt           0.0513 
_refine_ls_goodness_of_fit_ref    1.048 
_refine_ls_restrained_S_all       1.047 
_refine_ls_shift/su_max           0.002 
_refine_ls_shift/su_mean          0.000 
 
loop_ 
 _atom_site_label 
 _atom_site_type_symbol 
 _atom_site_fract_x 
 _atom_site_fract_y 
 _atom_site_fract_z 
 _atom_site_U_iso_or_equiv 
 _atom_site_adp_type 
 _atom_site_occupancy 
 _atom_site_symmetry_multiplicity 
 _atom_site_calc_flag 
 _atom_site_refinement_flags 
 _atom_site_disorder_assembly 
 _atom_site_disorder_group 
Pr1 Pr 0.39408(2) 0.44140(2) 0.81902(2) 0.01602(6) Uani 1 1 d . . . 
Cl1 Cl 0.07445(12) 0.45257(12) 0.82312(14) 0.0333(2) Uani 1 1 d . . . 
O1 O 0.4263(3) -0.2800(3) 1.0574(3) 0.0278(6) Uani 1 1 d . . . 
O2 O 0.4130(4) -0.3673(3) 0.8940(3) 0.0327(7) Uani 1 1 d . . . 
O3 O 0.3811(4) 0.6642(3) 0.5939(3) 0.0277(6) Uani 1 1 d . . . 
O4 O 0.4972(4) 0.6440(3) 0.3723(3) 0.0299(7) Uani 1 1 d . . . 
O5 O 0.2318(4) 0.3707(4) 1.0958(4) 0.0330(7) Uani 1 1 d D . . 
H5D H 0.148(4) 0.416(6) 1.110(7) 0.07(2) Uiso 1 1 d D . . 
H5C H 0.273(6) 0.380(6) 1.155(5) 0.063(19) Uiso 1 1 d D . . 
O6 O 0.6661(4) 0.5706(3) 0.6841(3) 0.0282(6) Uani 1 1 d D . . 
H6 H 0.662(5) 0.6618(7) 0.639(4) 0.022(11) Uiso 1 1 d D . . 
N4 N 0.1564(4) 0.0797(3) 1.0825(4) 0.0259(7) Uani 1 1 d . . . 
N3 N 0.2734(4) 0.1536(4) 0.9471(4) 0.0273(8) Uani 1 1 d . . . 
N2 N 0.3245(4) 0.0764(3) 0.8692(4) 0.0256(7) Uani 1 1 d . . . 
N1 N 0.2401(4) -0.0526(3) 0.9536(4) 0.0203(7) Uani 1 1 d . . . 
N5 N 0.0371(4) -0.1575(4) 1.1957(4) 0.0295(8) Uani 1 1 d D . . 
H5A H 0.021(5) -0.236(2) 1.190(5) 0.017(10) Uiso 1 1 d D . . 
H5B H -0.028(5) -0.139(6) 1.267(4) 0.049(16) Uiso 1 1 d D . . 
N6 N 0.2810(4) 0.9348(3) 0.4409(4) 0.0251(7) Uani 1 1 d . . . 
N7 N 0.3695(5) 1.0633(4) 0.3707(5) 0.0369(9) Uani 1 1 d . . . 
N8 N 0.3047(5) 1.1337(4) 0.4538(5) 0.0366(9) Uani 1 1 d . . . 
N9 N 0.1779(4) 1.0582(4) 0.5763(4) 0.0316(8) Uani 1 1 d . . . 
N10 N 0.0535(5) 0.8262(4) 0.6591(5) 0.0346(9) Uani 1 1 d D . . 
H10A H 0.081(7) 0.743(3) 0.663(7) 0.063(19) Uiso 1 1 d D . . 
H10B H -0.011(5) 0.841(6) 0.734(4) 0.049(16) Uiso 1 1 d D . . 
C1 C 0.3778(4) -0.2795(4) 0.9555(4) 0.0185(7) Uani 1 1 d . . . 
C2 C 0.2654(5) -0.1657(4) 0.8977(4) 0.0204(8) Uani 1 1 d . . . 
H2A H 0.3066 -0.1207 0.7869 0.024 Uiso 1 1 calc R . . 
H2B H 0.1637 -0.2136 0.9268 0.024 Uiso 1 1 calc R . . 
C3 C 0.1376(4) -0.0493(4) 1.0838(4) 0.0203(8) Uani 1 1 d . . . 
C4 C 0.4073(5) 0.7032(4) 0.4539(4) 0.0214(8) Uani 1 1 d . . . 
C5 C 0.3190(5) 0.8312(4) 0.3727(4) 0.0248(8) Uani 1 1 d . . . 
H5E H 0.3838 0.8801 0.2665 0.030 Uiso 1 1 calc R . . 
H5F H 0.2216 0.7948 0.3752 0.030 Uiso 1 1 calc R . . 
C6 C 0.1657(5) 0.9344(4) 0.5652(5) 0.0245(8) Uani 1 1 d . . . 
C7 C 0.8076(6) 0.5360(6) 0.5872(6) 0.0430(12) Uani 1 1 d . . . 
H7B H 0.8914 0.6066 0.5532 0.064 Uiso 1 1 calc R . . 
H7C H 0.7873 0.5368 0.5003 0.064 Uiso 1 1 calc R . . 
H7D H 0.8386 0.4418 0.6435 0.064 Uiso 1 1 calc R . . 
 
loop_ 
 _atom_site_aniso_label 
 _atom_site_aniso_U_11 
 _atom_site_aniso_U_22 
 _atom_site_aniso_U_33 
 _atom_site_aniso_U_23 
 _atom_site_aniso_U_13 
 _atom_site_aniso_U_12 
Pr1 0.01876(10) 0.01430(10) 0.01612(10) -0.00846(7) -0.00483(8) 0.00311(7) 
Cl1 0.0263(5) 0.0319(5) 0.0484(7) -0.0206(5) -0.0159(5) 0.0053(4) 
O1 0.0316(16) 0.0282(15) 0.0321(16) -0.0162(13) -0.0187(14) 0.0117(12) 
O2 0.0444(18) 0.0219(15) 0.0368(17) -0.0203(13) -0.0097(15) 0.0057(13) 
O3 0.0380(17) 0.0257(15) 0.0175(14) -0.0097(12) -0.0075(13) 0.0078(12) 
O4 0.0426(18) 0.0234(15) 0.0220(15) -0.0143(12) -0.0045(13) 0.0101(13) 
O5 0.0279(17) 0.047(2) 0.0257(16) -0.0201(15) -0.0026(14) -0.0015(15) 
O6 0.0326(16) 0.0163(14) 0.0286(16) -0.0070(12) -0.0041(13) 0.0011(12) 
N4 0.0299(18) 0.0198(17) 0.0280(18) -0.0131(14) -0.0045(15) -0.0010(14) 
N3 0.0246(17) 0.0202(17) 0.039(2) -0.0170(15) -0.0069(16) 0.0034(13) 
N2 0.0240(17) 0.0169(16) 0.0309(19) -0.0104(14) -0.0025(15) 0.0020(13) 
N1 0.0222(16) 0.0110(14) 0.0258(17) -0.0074(13) -0.0066(14) 0.0043(12) 
N5 0.035(2) 0.0203(18) 0.029(2) -0.0123(16) -0.0011(17) -0.0044(15) 
N6 0.0275(18) 0.0169(16) 0.0254(18) -0.0084(14) -0.0031(15) 0.0041(13) 
N7 0.036(2) 0.0218(18) 0.040(2) -0.0114(17) 0.0025(18) -0.0015(15) 
N8 0.037(2) 0.0200(18) 0.039(2) -0.0094(16) 0.0022(18) -0.0042(15) 
N9 0.034(2) 0.0274(19) 0.033(2) -0.0166(16) -0.0062(17) 0.0055(15) 
N10 0.032(2) 0.030(2) 0.032(2) -0.0138(17) 0.0055(17) -0.0079(17) 
C1 0.0215(18) 0.0104(16) 0.0191(18) -0.0043(14) -0.0034(15) -0.0001(14) 
C2 0.0251(19) 0.0172(18) 0.024(2) -0.0125(15) -0.0109(16) 0.0070(15) 
C3 0.0189(18) 0.0181(18) 0.025(2) -0.0101(16) -0.0092(16) 0.0061(14) 
C4 0.0239(19) 0.0209(19) 0.023(2) -0.0133(16) -0.0052(16) -0.0015(15) 
C5 0.030(2) 0.025(2) 0.0190(19) -0.0109(16) -0.0069(17) 0.0079(16) 
C6 0.023(2) 0.027(2) 0.023(2) -0.0116(17) -0.0080(17) 0.0059(16) 
C7 0.030(2) 0.047(3) 0.051(3) -0.028(3) -0.002(2) 0.004(2) 
 
_geom_special_details 
; 
 All esds (except the esd in the dihedral angle between two l.s. planes) 
 are estimated using the full covariance matrix.  The cell esds are taken 
 into account individually in the estimation of esds in distances, angles 
 and torsion angles; correlations between esds in cell parameters are only 
 used when they are defined by crystal symmetry.  An approximate (isotropic) 
 treatment of cell esds is used for estimating esds involving l.s. planes. 
; 
 
loop_ 
 _geom_bond_atom_site_label_1 
 _geom_bond_atom_site_label_2 
 _geom_bond_distance 
 _geom_bond_site_symmetry_2 
 _geom_bond_publ_flag 
Pr1 O4 2.347(3) 2_666 ? 
Pr1 O2 2.414(3) 1_565 ? 
Pr1 O1 2.447(3) 2_657 ? 
Pr1 O3 2.487(3) . ? 
Pr1 O5 2.520(3) . ? 
Pr1 O6 2.535(3) . ? 
Pr1 N3 2.817(3) . ? 
Pr1 Cl1 2.8429(12) . ? 
O1 C1 1.253(5) . ? 
O1 Pr1 2.447(3) 2_657 ? 
O2 C1 1.256(4) . ? 
O2 Pr1 2.414(3) 1_545 ? 
O3 C4 1.253(5) . ? 
O4 C4 1.258(4) . ? 
O4 Pr1 2.347(3) 2_666 ? 
O5 H5D 0.85(6) . ? 
O5 H5C 0.85(6) . ? 
O6 C7 1.442(5) . ? 
O6 H6 0.85(2) . ? 
N4 C3 1.337(5) . ? 
N4 N3 1.373(5) . ? 
N3 N2 1.293(5) . ? 
N2 N1 1.360(4) . ? 
N1 C3 1.350(5) . ? 
N1 C2 1.456(4) . ? 
N5 C3 1.334(5) . ? 
N5 H5A 0.85(3) . ? 
N5 H5B 0.85(5) . ? 
N6 C6 1.340(5) . ? 
N6 N7 1.376(5) . ? 
N6 C5 1.450(5) . ? 
N7 N8 1.292(5) . ? 
N8 N9 1.362(5) . ? 
N9 C6 1.332(5) . ? 
N10 C6 1.352(5) . ? 
N10 H10A 0.85(5) . ? 
N10 H10B 0.85(5) . ? 
C1 C2 1.518(5) . ? 
C2 H2A 0.9700 . ? 
C2 H2B 0.9700 . ? 
C4 C5 1.531(5) . ? 
C5 H5E 0.9700 . ? 
C5 H5F 0.9700 . ? 
C7 H7B 0.9600 . ? 
C7 H7C 0.9600 . ? 
C7 H7D 0.9600 . ? 
 
loop_ 
 _geom_angle_atom_site_label_1 
 _geom_angle_atom_site_label_2 
 _geom_angle_atom_site_label_3 
 _geom_angle 
 _geom_angle_site_symmetry_1 
 _geom_angle_site_symmetry_3 
 _geom_angle_publ_flag 
O4 Pr1 O2 144.27(11) 2_666 1_565 ? 
O4 Pr1 O1 85.01(10) 2_666 2_657 ? 
O2 Pr1 O1 96.89(10) 1_565 2_657 ? 
O4 Pr1 O3 80.97(9) 2_666 . ? 
O2 Pr1 O3 76.90(10) 1_565 . ? 
O1 Pr1 O3 144.24(10) 2_657 . ? 
O4 Pr1 O5 144.52(11) 2_666 . ? 
O2 Pr1 O5 69.89(11) 1_565 . ? 
O1 Pr1 O5 79.76(11) 2_657 . ? 
O3 Pr1 O5 128.05(11) . . ? 
O4 Pr1 O6 78.26(11) 2_666 . ? 
O2 Pr1 O6 68.34(10) 1_565 . ? 
O1 Pr1 O6 73.37(10) 2_657 . ? 
O3 Pr1 O6 71.63(10) . . ? 
O5 Pr1 O6 126.28(11) . . ? 
O4 Pr1 N3 73.94(11) 2_666 . ? 
O2 Pr1 N3 140.39(11) 1_565 . ? 
O1 Pr1 N3 71.06(10) 2_657 . ? 
O3 Pr1 N3 134.21(10) . . ? 
O5 Pr1 N3 70.85(11) . . ? 
O6 Pr1 N3 136.16(10) . . ? 
O4 Pr1 Cl1 98.11(9) 2_666 . ? 
O2 Pr1 Cl1 102.07(8) 1_565 . ? 
O1 Pr1 Cl1 141.24(8) 2_657 . ? 
O3 Pr1 Cl1 73.65(8) . . ? 
O5 Pr1 Cl1 75.61(9) . . ? 
O6 Pr1 Cl1 145.23(7) . . ? 
N3 Pr1 Cl1 72.80(8) . . ? 
C1 O1 Pr1 130.0(2) . 2_657 ? 
C1 O2 Pr1 162.0(3) . 1_545 ? 
C4 O3 Pr1 138.4(2) . . ? 
C4 O4 Pr1 162.1(3) . 2_666 ? 
Pr1 O5 H5D 114(4) . . ? 
Pr1 O5 H5C 119(4) . . ? 
H5D O5 H5C 102(6) . . ? 
C7 O6 Pr1 129.7(3) . . ? 
C7 O6 H6 104(3) . . ? 
Pr1 O6 H6 113(3) . . ? 
C3 N4 N3 105.2(3) . . ? 
N2 N3 N4 111.5(3) . . ? 
N2 N3 Pr1 119.0(3) . . ? 
N4 N3 Pr1 129.3(2) . . ? 
N3 N2 N1 106.3(3) . . ? 
C3 N1 N2 108.6(3) . . ? 
C3 N1 C2 130.5(3) . . ? 
N2 N1 C2 120.9(3) . . ? 
C3 N5 H5A 124(3) . . ? 
C3 N5 H5B 117(4) . . ? 
H5A N5 H5B 118(5) . . ? 
C6 N6 N7 108.3(3) . . ? 
C6 N6 C5 132.0(3) . . ? 
N7 N6 C5 119.6(3) . . ? 
N8 N7 N6 105.3(3) . . ? 
N7 N8 N9 112.3(3) . . ? 
C6 N9 N8 105.1(3) . . ? 
C6 N10 H10A 115(4) . . ? 
C6 N10 H10B 114(4) . . ? 
H10A N10 H10B 124(5) . . ? 
O1 C1 O2 125.8(4) . . ? 
O1 C1 C2 119.4(3) . . ? 
O2 C1 C2 114.8(3) . . ? 
N1 C2 C1 115.1(3) . . ? 
N1 C2 H2A 108.5 . . ? 
C1 C2 H2A 108.5 . . ? 
N1 C2 H2B 108.5 . . ? 
C1 C2 H2B 108.5 . . ? 
H2A C2 H2B 107.5 . . ? 
N5 C3 N4 125.9(4) . . ? 
N5 C3 N1 125.7(3) . . ? 
N4 C3 N1 108.4(3) . . ? 
O3 C4 O4 126.1(4) . . ? 
O3 C4 C5 118.2(3) . . ? 
O4 C4 C5 115.7(3) . . ? 
N6 C5 C4 113.1(3) . . ? 
N6 C5 H5E 109.0 . . ? 
C4 C5 H5E 109.0 . . ? 
N6 C5 H5F 109.0 . . ? 
C4 C5 H5F 109.0 . . ? 
H5E C5 H5F 107.8 . . ? 
N9 C6 N6 108.9(4) . . ? 
N9 C6 N10 126.7(4) . . ? 
N6 C6 N10 124.3(4) . . ? 
O6 C7 H7B 109.5 . . ? 
O6 C7 H7C 109.5 . . ? 
H7B C7 H7C 109.5 . . ? 
O6 C7 H7D 109.5 . . ? 
H7B C7 H7D 109.5 . . ? 
H7C C7 H7D 109.5 . . ? 
 
loop_ 
 _geom_torsion_atom_site_label_1 
 _geom_torsion_atom_site_label_2 
 _geom_torsion_atom_site_label_3 
 _geom_torsion_atom_site_label_4 
 _geom_torsion 
 _geom_torsion_site_symmetry_1 
 _geom_torsion_site_symmetry_2 
 _geom_torsion_site_symmetry_3 
 _geom_torsion_site_symmetry_4 
 _geom_torsion_publ_flag 
O4 Pr1 O3 C4 5.4(4) 2_666 . . . ? 
O2 Pr1 O3 C4 157.2(4) 1_565 . . . ? 
O1 Pr1 O3 C4 73.6(4) 2_657 . . . ? 
O5 Pr1 O3 C4 -151.9(4) . . . . ? 
O6 Pr1 O3 C4 86.0(4) . . . . ? 
N3 Pr1 O3 C4 -51.5(4) . . . . ? 
Cl1 Pr1 O3 C4 -95.9(4) . . . . ? 
O4 Pr1 O6 C7 -20.2(4) 2_666 . . . ? 
O2 Pr1 O6 C7 172.7(4) 1_565 . . . ? 
O1 Pr1 O6 C7 68.0(4) 2_657 . . . ? 
O3 Pr1 O6 C7 -104.5(4) . . . . ? 
O5 Pr1 O6 C7 131.3(4) . . . . ? 
N3 Pr1 O6 C7 31.1(4) . . . . ? 
Cl1 Pr1 O6 C7 -107.6(4) . . . . ? 
C3 N4 N3 N2 -0.2(4) . . . . ? 
C3 N4 N3 Pr1 175.9(3) . . . . ? 
O4 Pr1 N3 N2 5.4(3) 2_666 . . . ? 
O2 Pr1 N3 N2 -162.4(3) 1_565 . . . ? 
O1 Pr1 N3 N2 -84.8(3) 2_657 . . . ? 
O3 Pr1 N3 N2 64.8(3) . . . . ? 
O5 Pr1 N3 N2 -170.2(3) . . . . ? 
O6 Pr1 N3 N2 -47.4(3) . . . . ? 
Cl1 Pr1 N3 N2 109.4(3) . . . . ? 
O4 Pr1 N3 N4 -170.4(3) 2_666 . . . ? 
O2 Pr1 N3 N4 21.9(4) 1_565 . . . ? 
O1 Pr1 N3 N4 99.4(3) 2_657 . . . ? 
O3 Pr1 N3 N4 -110.9(3) . . . . ? 
O5 Pr1 N3 N4 14.0(3) . . . . ? 
O6 Pr1 N3 N4 136.8(3) . . . . ? 
Cl1 Pr1 N3 N4 -66.4(3) . . . . ? 
N4 N3 N2 N1 0.1(4) . . . . ? 
Pr1 N3 N2 N1 -176.4(2) . . . . ? 
N3 N2 N1 C3 -0.1(4) . . . . ? 
N3 N2 N1 C2 178.7(3) . . . . ? 
C6 N6 N7 N8 -0.2(5) . . . . ? 
C5 N6 N7 N8 177.7(4) . . . . ? 
N6 N7 N8 N9 0.3(5) . . . . ? 
N7 N8 N9 C6 -0.2(5) . . . . ? 
Pr1 O1 C1 O2 0.5(6) 2_657 . . . ? 
Pr1 O1 C1 C2 -179.9(2) 2_657 . . . ? 
Pr1 O2 C1 O1 111.9(8) 1_545 . . . ? 
Pr1 O2 C1 C2 -67.7(10) 1_545 . . . ? 
C3 N1 C2 C1 -85.3(5) . . . . ? 
N2 N1 C2 C1 96.2(4) . . . . ? 
O1 C1 C2 N1 7.9(5) . . . . ? 
O2 C1 C2 N1 -172.4(3) . . . . ? 
N3 N4 C3 N5 178.9(4) . . . . ? 
N3 N4 C3 N1 0.1(4) . . . . ? 
N2 N1 C3 N5 -178.8(4) . . . . ? 
C2 N1 C3 N5 2.5(6) . . . . ? 
N2 N1 C3 N4 0.0(4) . . . . ? 
C2 N1 C3 N4 -178.7(3) . . . . ? 
Pr1 O3 C4 O4 -23.3(7) . . . . ? 
Pr1 O3 C4 C5 154.5(3) . . . . ? 
Pr1 O4 C4 O3 147.9(7) 2_666 . . . ? 
Pr1 O4 C4 C5 -29.9(11) 2_666 . . . ? 
C6 N6 C5 C4 -79.3(5) . . . . ? 
N7 N6 C5 C4 103.3(4) . . . . ? 
O3 C4 C5 N6 29.7(5) . . . . ? 
O4 C4 C5 N6 -152.3(4) . . . . ? 
N8 N9 C6 N6 0.1(5) . . . . ? 
N8 N9 C6 N10 -177.7(4) . . . . ? 
N7 N6 C6 N9 0.1(5) . . . . ? 
C5 N6 C6 N9 -177.5(4) . . . . ? 
N7 N6 C6 N10 178.0(4) . . . . ? 
C5 N6 C6 N10 0.4(7) . . . . ? 
 
loop_ 
 _geom_hbond_atom_site_label_D 
 _geom_hbond_atom_site_label_H 
 _geom_hbond_atom_site_label_A 
 _geom_hbond_distance_DH 
 _geom_hbond_distance_HA 
 _geom_hbond_distance_DA 
 _geom_hbond_angle_DHA 
 _geom_hbond_site_symmetry_A 
N5 H5A Cl1  0.86(3) 2.51(3) 3.360(4) 170(4) 2_557 
N5 H5B N9  0.85(5) 2.12(5) 2.958(5) 171(5) 2_567 
O5 H5D Cl1  0.85(6) 2.36(6) 3.199(4) 172(6) 2_567 
N10 H10B N4  0.85(5) 2.30(5) 3.139(5) 169(5) 2_567 
O5 H5C O6  0.85(6) 2.14(5) 2.973(4) 168(6) 2_667 
O6 H6 N8  0.85(2) 1.899(10) 2.735(5) 168(4) 2_676 
N10 H10A Cl1  0.85(2) 2.71(3) 3.473(4) 151(5) . 
C5 H5E N3  0.97 3.20 3.964(5) 136.8 2_666 
 
_diffrn_measured_fraction_theta_max    0.993 
_diffrn_reflns_theta_full              27.46 
_diffrn_measured_fraction_theta_full   0.993 
_refine_diff_density_max    0.538 
_refine_diff_density_min   -0.971 
_refine_diff_density_rms    0.134 
